# Supplementary material
Source: publisher figshare collection journal article supplement (https://gsajournals.figshare.com/articles/dataset/_/6165824)
Supplement: Supplementary file 1 [file 2]

## Sheet: Sheet1
	AMPLICONIC REGION			UNIT OF DUPLICATION				COPY NUMBER VARIATION											ANOVA		Polymorphic		Fixed		Selection tests
AR	start	end	length	gene	start	end	length	Min CN	Max CN	Delta CN	Median CN	Africa	America	Central Asia S	East Asia	Oceania	South Asia	West Eurasia	qvalue	VST	NS	S	NS	S	alpha	DoS	pvalue
4_0	48343310	48434604	91294	SSX3	48346427	48356753	10326	0.5	0.95	0.45	0.64	0.65	0.65	0.61	0.63	0.63	0.63	0.65	0.0567727	0.0321548	6	1	1	3	-17	-0.607143	0.0878788
5_0	49119846	49205921	86075	-	49156654	49157446	792	0.21	0.84	0.63	0.49	0.53	0.49	0.48	0.48	0.49	0.5	0.49	0.432235	0.00367499	0	0	0	0	NA	NA	1
6_0	49219545	49680241	460696	GAGE4	49560875	49568204	7329	6.07	24.32	18.25	12.58	13.38	15.03	13.18	11.84	11.1	13.81	11.75	0.000109117	0.105772	7	2	4	0	1	0.222222	1
8_0	51652533	51749766	97233	CENPVP1	51668061	51692964	24903	1.5	2.33	0.83	1.78	1.8	1.78	1.78	1.74	1.75	1.78	1.79	0.0403273	0.0444478	6	4	0	1	NA	-0.6	0.454545
9_0	52032464	52223402	190938	MAGED4,SNORA11D	52061826	52069272	7446	1	2.45	1.45	1.43	1.47	1.49	1.41	1.38	1.38	1.4	1.45	0.030816	0.0456488	8	7	2	2	-0.142857	-0.0333333	1
10_0	52510851	52998207	487356	SSX2	52696895	52707227	10332	0.95	1.75	0.8	1.23	1.24	1.24	1.19	1.22	1.23	1.24	1.25	0.0173769	0.0412342	2	3	4	1	0.833333	0.4	0.52381
10_1	52510851	52998207	487356	FAM156A	52897295	52908558	11263	1.25	2.6	1.35	1.74	1.75	1.78	1.67	1.73	1.72	1.71	1.76	0.030816	0.0432164	6	0	1	1	NA	-0.5	0.25
11_0	55437684	55547739	110055	-	55453488	55480142	26654	1.49	2.3	0.81	1.82	1.84	1.84	1.79	1.82	1.77	1.83	1.85	0.0017186	0.0777183	0	0	0	0	NA	NA	1
12_0	63116263	63275473	159210	-	63128118	63185586	57468	1.67	2.53	0.86	1.83	1.84	1.85	1.85	1.81	1.83	1.85	1.84	0.12207	0.0376772	0	0	0	0	NA	NA	1
13_0	71674267	71835832	161565	CXorf49	71683103	71739752	56649	0.95	2.43	1.48	1.59	1.64	1.62	1.52	1.58	1.53	1.55	1.61	0.00468844	0.0574353	14	11	11	2	0.768595	0.286154	0.148199
14_0	72721314	73105236	383922	FAM226A	72741025	72854698	113673	1.47	2.1	0.63	1.75	1.77	1.76	1.72	1.74	1.72	1.74	1.76	0.12207	0.0211549	7	2	2	0	1	0.222222	1
14_1	72721314	73105236	383922	PABPC1L2B	72996059	73006093	10034	1.28	2.2	0.92	1.58	1.62	1.62	1.58	1.56	1.55	1.55	1.58	0.185576	0.015958	2	1	0	0	NA	NA	1
16_0	101563740	101648990	85250	-	101597507	101602200	4693	1.2	2.65	1.45	1.59	1.64	1.66	1.53	1.55	1.54	1.56	1.61	0.0173769	0.0551741	0	0	0	0	NA	NA	1
17_0	102180805	102519463	338658	TCEAL2	102125687	102127712	2025	0.5	1.3	0.8	0.72	0.73	0.72	0.68	0.73	0.7	0.7	0.72	0.185576	0.0155826	5	2	3	1	0.166667	0.0357143	1
17_1	102180805	102519463	338658	TCP11X2,NFX2	102197559	102338171	140612	1.56	2.06	0.49	1.81	1.83	1.82	1.81	1.79	1.79	1.81	1.81	0.0674979	0.0317393	9	7	14	4	0.632653	0.215278	0.274305
18_0	103940531	104117650	177119	TMSB15B	103975923	103978357	2434	1.25	2.33	1.08	1.65	1.71	1.56	1.56	1.62	1.55	1.64	1.69	0.00470189	0.0776748	0	0	0	0	NA	NA	1
18_1	103940531	104117650	177119	H2BFXP	103962626	103965990	3364	0.75	1.38	0.62	0.92	0.93	0.91	0.92	0.9	0.92	0.95	0.94	0.220099	0.017759	0	0	0	2	NA	NA	1
21_0	115839882	115901847	61965	-	115843271	115844362	1091	13.72	65.5	51.78	32.77	30.98	41.16	32.91	30.05	30.94	33.15	34.82	0.00320808	0.0668136	0	0	0	0	NA	NA	1
23_0	120006842	120219579	212737	RHOXF2	120038204	120087070	48866	1.42	2.25	0.83	1.76	1.78	1.8	1.7	1.79	1.79	1.73	1.76	0.0674979	0.0248731	9	3	12	0	1	0.25	0.217391
24_0	120864869	120993348	128479	CT47A4	120933840	120937158	3318	1.86	15.07	13.21	5.01	5.6	3.93	5.13	4.8	4.93	4.46	5.23	0.225768	0.0081343	19	7	6	3	-0.357143	-0.0641026	0.693637
25_0	135145248	135269268	124020	CT55	135156535	135171827	15292	0.83	1.15	0.32	1	1.01	1.03	1	1	1	1	1	0.656586	0.00121356	4	2	10	0	1	0.333333	0.125
26_0	135656801	135914069	257268	CT45A5	135777129	135785475	8346	2.5	9.75	7.25	6.1	6.76	4.93	5.05	6.06	6.89	6.65	6.02	0.00117154	0.0787788	10	4	4	1	0.375	0.0857143	1
27_0	140964264	141635364	671100	SPANXB1	140998306	141014744	16438	1.59	8.79	7.2	3.07	3.83	3.02	2.32	2.62	2.06	3.46	3.32	1.95056e-08	0.164576	6	2	2	1	-0.5	-0.0833333	1
29_0	149560603	149927176	366573	CXorf40A	149540973	149548331	7358	0.89	1.9	1.01	1.18	1.19	1.21	1.14	1.17	1.14	1.15	1.19	0.0567727	0.0265127	6	5	2	2	-0.2	-0.0454545	1
29_1	149560603	149927176	366573	MAGEA9	149581652	149587459	5807	1.1	2.45	1.35	1.52	1.54	1.56	1.47	1.5	1.52	1.47	1.55	0.0567727	0.0312175	11	3	10	3	-0.1	-0.0164835	1
29_2	149560603	149927176	366573	HSFX1	149592522	149595314	2792	1.13	2.6	1.47	1.53	1.57	1.5	1.48	1.55	1.47	1.48	1.56	0.0567727	0.0286716	19	9	6	3	-0.0555556	-0.0119048	1
30_0	152659398	152803667	144269	MAGEA3	152698751	152702347	3596	0.95	2	1.05	1.26	1.24	1.25	1.24	1.26	1.25	1.25	1.31	0.0459807	0.0276779	15	7	9	2	0.52381	0.136364	0.680786
30_1	152659398	152803667	144269	CSAG3	152708260	152714549	6289	1.38	2.17	0.79	1.77	1.77	1.83	1.81	1.76	1.74	1.76	1.76	0.490674	-0.00446531	0	0	0	0	NA	NA	1
31_0	153036835	153293790	256955	PNMA6A	153066006	153074419	8413	0.94	2.95	2.01	1.38	1.41	1.39	1.36	1.33	1.35	1.33	1.41	0.0915785	0.0207874	15	7	1	2	-3.28571	-0.348485	0.530435
31_1	153036835	153293790	256955	-	153106155	153149744	43589	1.32	3.6	2.28	1.69	1.72	1.74	1.64	1.69	1.68	1.67	1.69	0.185576	0.0178311	0	0	0	0	NA	NA	1
32_0	154310039	154594360	284321	OPN1LW	154144223	154159032	14809	1.11	4.72	3.61	1.94	2.22	1.59	1.82	1.71	1.63	1.62	2.31	7.75161e-06	0.116439	12	9	0	4	NA	-0.571429	0.0956522
32_1	154310039	154594360	284321	-	154336228	154347255	11027	0.88	2.2	1.33	1.37	1.4	1.38	1.32	1.34	1.28	1.35	1.44	0.00117154	0.0714978	0	0	0	0	NA	NA	1
33_0	155335399	155534547	199148	H2AFB3,FBA1,MIR1184-1,TMLHE-AS1	155336694	155386748	50054	1.65	2.33	0.68	1.83	1.85	1.84	1.78	1.82	1.84	1.83	1.83	0.016089	0.0472827	13	9	3	2	0.037037	0.00909091	1
34_0	-	-	-	FAM223A,CTAG1B	154571247	154586816	15569	0.76	2.45	1.69	1.7	1.76	1.71	1.63	1.71	1.66	1.65	1.72	0.0269401	0.0462923	12	4	7	0	1	0.25	0.272727
